# Supplementary material for: Rhizosphere Microbiome and Phenolic Acid Exudation of the Healthy and Diseased American Ginseng Were Modulated by the Cropping History
Source: MDPI journal article supplement (doi:10.3390/plants12162993), 2023-08-19
Supplement: s1 [file s1]

Table S1. Relative abundance of fungi in the rhizosphere soil of diseased and healthy American ginseng at the phylum level

| Phylum            | Relative abundance (%) |       |       |       |       |       |       |       |
|-------------------|------------------------|-------|-------|-------|-------|-------|-------|-------|
|                   | 1Y-H                   | 1Y-D  | 2Y-H  | 2Y-D  | 3Y-H  | 3Y-D  | 4Y-H  | 4Y-D  |
| Ascomycota        | 81.2                   | 80.05 | 71.97 | 83.93 | 83.19 | 86.47 | 75.27 | 63.35 |
| Basidiomycota     | 8.77                   | 8.39  | 10.48 | 4.9   | 4.69  | 2.48  | 6.28  | 2.73  |
| Mortierellomycota | 1.91                   | 1.76  | 2.4   | 2.05  | 3.08  | 1.26  | 3.14  | 0.88  |
| Mucoromycota      | 1.39                   | 0.45  | 5.39  | 1.32  | 2.77  | 0.33  | 11.15 | 2.65  |
| other             | 0.04                   | 0     | 0.06  | 0.08  | 0.22  | 0.1   | 0     | 0     |
| unclassified      | 6.69                   | 9.36  | 9.69  | 7.72  | 6.05  | 9.35  | 4.25  | 30.39 |

Table S2. Relative abundance of bacteria in the rhizosphere soil of diseased and healthy American ginseng at the phylum level

| Phylum           | Relative abundancen (%) |       |       |       |       |       |       |       |
|------------------|-------------------------|-------|-------|-------|-------|-------|-------|-------|
|                  | 1Y-H                    | 1Y-D  | 2Y-H  | 2Y-D  | 3Y-H  | 3Y-D  | 4Y-H  | 4Y-D  |
| Proteobacteria   | 35.1                    | 38.58 | 38.95 | 43.69 | 39.53 | 37.63 | 34.27 | 48.83 |
| Actinobacteria   | 33.74                   | 28.27 | 28.22 | 26.67 | 20.73 | 19.07 | 24.12 | 24.26 |
| Acidobacteria    | 9.2                     | 11.19 | 13.62 | 12.55 | 14.47 | 17.29 | 12.3  | 7.99  |
| Firmicutes       | 11.63                   | 10.94 | 8.77  | 7.02  | 12.08 | 11.04 | 19.31 | 7.85  |
| Chloroflexi      | 5.6                     | 6.05  | 5.74  | 4.87  | 6.54  | 6.88  | 5.45  | 3.21  |
| Bacteroidetes    | 0.97                    | 1.37  | 0.95  | 2.1   | 2.08  | 3.09  | 1.06  | 5.5   |
| Gemmatimonadetes | 1.64                    | 1.74  | 1.66  | 1.14  | 1.79  | 1.69  | 1.64  | 0.79  |
| Other            | 2.14                    | 1.88  | 2.09  | 1.96  | 2.77  | 3.31  | 1.83  | 1.59  |

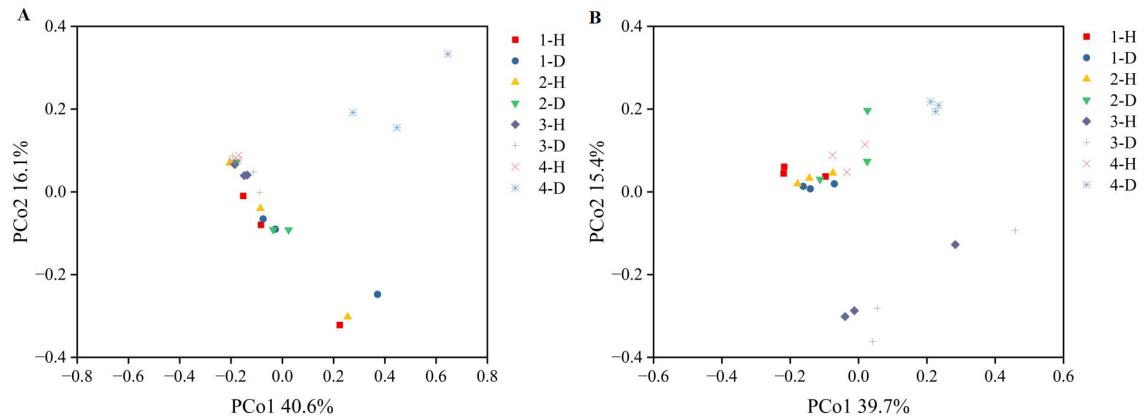

Fig S1. Principal component analysis of American ginseng rhizosphere fungi (A) and bacteria (B) in soils with the healthy (H) and diseased (D) American ginseng in 1-4 years of continuous monocropping (1Y, 2Y, 3Y and 4Y).
